# Supplementary material for: Hydroxyethyl cellulose matrix applied to serial crystallography
Source: PubMed Central journal article supplement (PMC5429652; doi:10.1038/s41598-017-00761-0), 2017-04-06
Supplement: 41598_2017_761_MOESM1_ESM.pdf [file 41598_2017_761_MOESM1_ESM.pdf]

# **Hydroxyethyl cellulose matrix applied to serial crystallography**

Michihiro Sugahara<sup>\*</sup>, Takanori Nakane, Tetsuya Masuda, Mamoru Suzuki, Shigeyuki Inoue, Changyong Song, Rie Tanaka, Toru Nakatsu, Eiichi Mizohata, Fumiaki Yumoto, Kensuke Tono, Yasumasa Joti, Takashi Kameshima, Takaki Hatsui, Makina Yabashi, Osamu Nureki, Keiji Numata, Eriko Nango, So Iwata

## **Supplementary Figures**

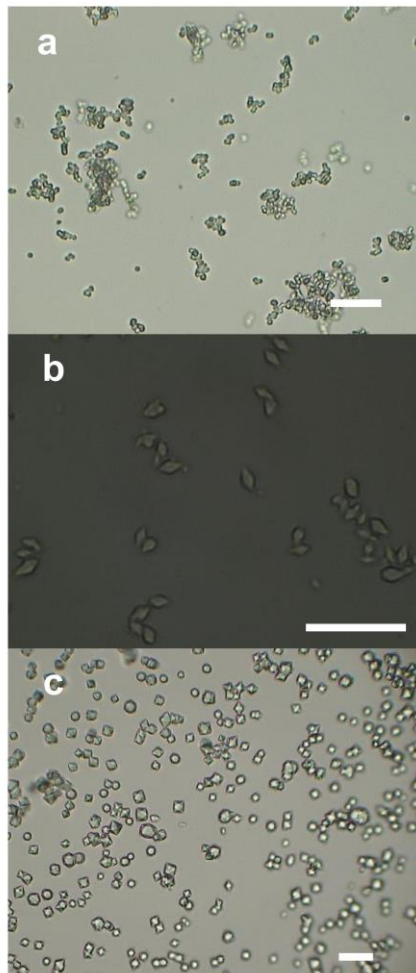

**Supplementary Figure 1: Protein microcrystals used for SFX measurements. (a) lysozyme, (b) thaumatin and (c) proteinase K crystals. Scale bars represent 20  $\mu\text{m}$ .**

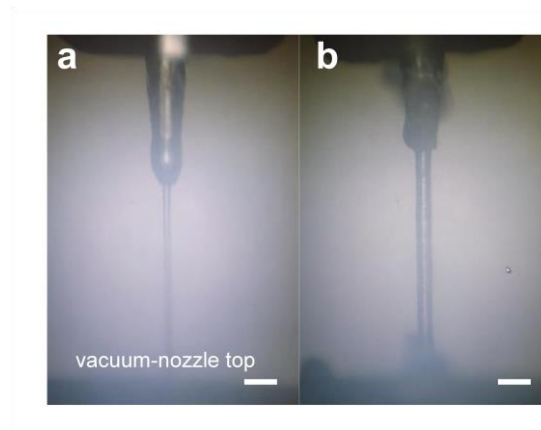

**Supplementary Figure 2: Sample extrusion of the two crystal carriers.** (a) hydroxyethyl cellulose and (b) Super Lube Nuclear grease were extruded as a continuous column to intersect with the XFEL beam through a 50- and 100- $\mu\text{m}$ -i.d. nozzle, respectively. Scale bars represent 200  $\mu\text{m}$ .

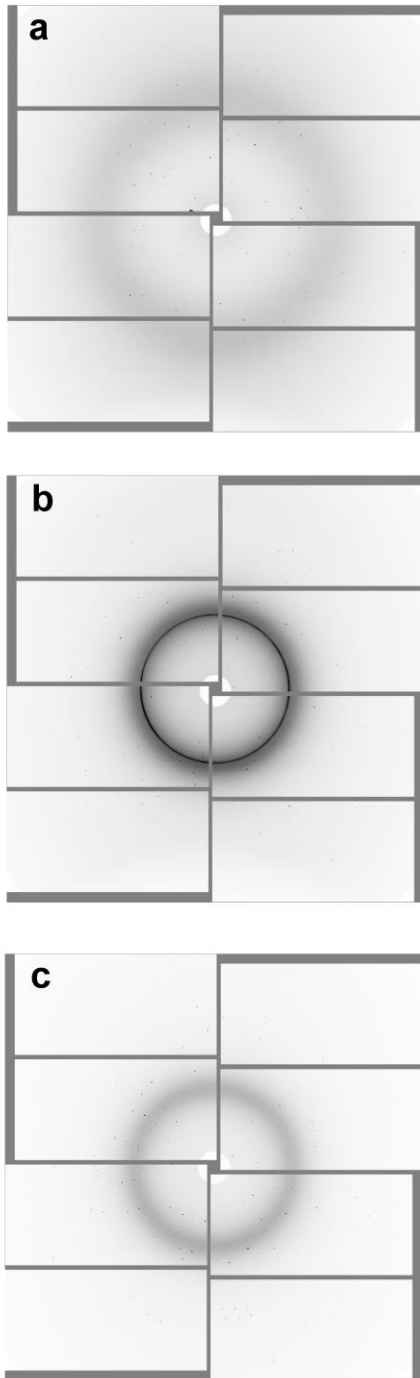

**Supplementary Figure 3: Typical XFEL single diffraction.** (a) cellulose matrix, (b) Super Lube synthetic grease and (c) Super Lube nuclear grease.

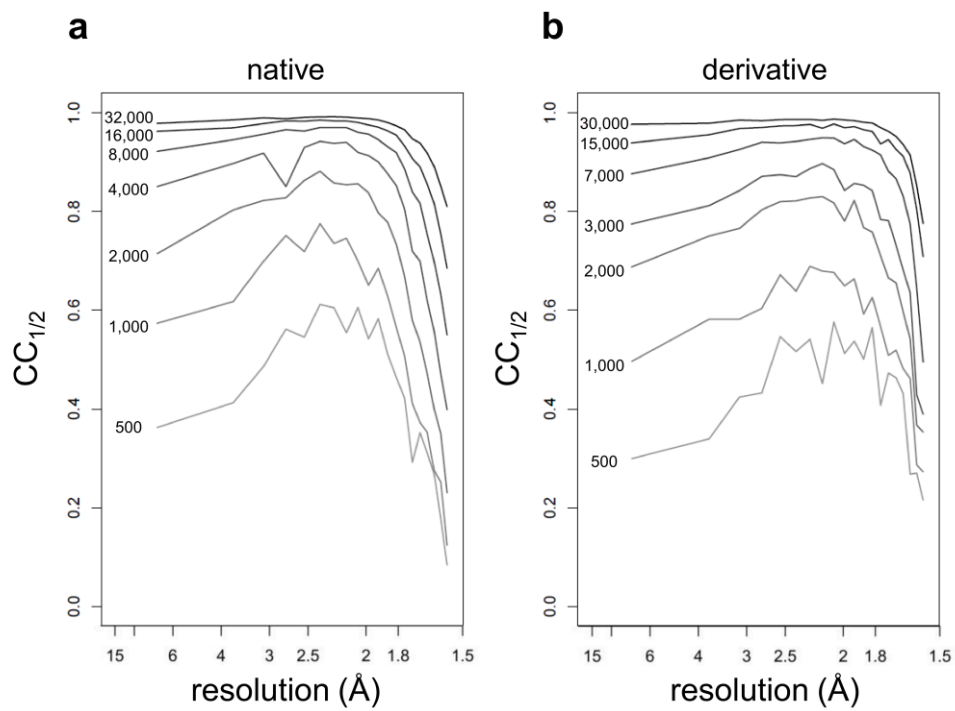

**Supplementary Figure 4:  $CC_{1/2}$  of the proteinase K datasets for different numbers of indexed images. (a) native and (b) Pr-derivative.**
